# Supplementary material for: CRISPR activation rescues abnormalities in SCN2A haploinsufficiency-associated autism spectrum disorder
Source: bioRxiv or medRxiv preprint supplement (doi:10.1101/2022.03.30.486483), 2022-04-01
Supplement: Supplementary file [file media-1.pdf]

## Supplementary Materials

### CRISPR activation rescues abnormalities in *SCN2A* haploinsufficiency-associated autism spectrum disorder

Serena Tamura<sup>1,2†</sup>, Andrew D. Nelson<sup>3,4†</sup>, Perry W.E. Spratt<sup>3,4†</sup>, Henry Kyoung<sup>3,4</sup>, Xujia Zhou<sup>1,2</sup>, Zizheng Li<sup>1,2</sup>, Jingjing Zhao<sup>1,2</sup>, Stephanie S. Holden<sup>6,7</sup>, Atehsa Sahagun<sup>3,4</sup>, Caroline M. Keeshen<sup>3,4</sup>, Congyi Lu<sup>8</sup>, Elizabeth C. Hamada<sup>3,4</sup>, Roy Ben-Shalom<sup>3,4</sup>, Jen Q. Pan<sup>8</sup>, Jeanne T. Paz<sup>6,7</sup>, Stephan J. Sanders<sup>3,5</sup>, Navneet Matharu<sup>1,2</sup>, Nadav Ahituv<sup>1,2\*</sup>, Kevin J. Bender<sup>3,4\*</sup>

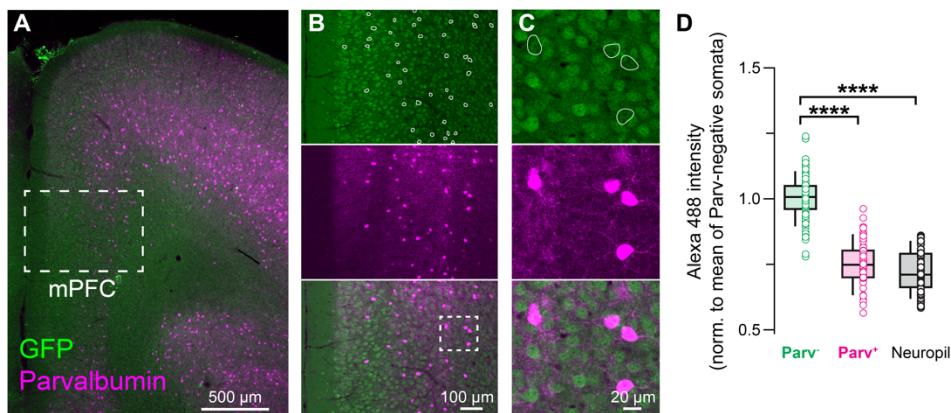

**Figure S1: Excitatory pyramidal neurons in the mPFC are GFP+ in Cre-negative *Scn2a*<sup>+/*Kl*</sup> animals.**

**A-C:** Coronal brain sections from P60 *Scn2a*<sup>+/*Kl*</sup> mouse (Cre-) immunostained with anti-GFP and anti-parvalbumin (PV).

**D:** Quantification of mean fluorescence intensity of GFP in PV-negative cells, PV-positive cells, and neuropil (area without somata as a measure of background fluorescence). Data are from 2 mice. Parv-:  $1.0 \pm 0.01$ ,  $n = 67$  cells; Parv+  $0.7 \pm 0.01$ ,  $n = 37$  cells; neuropil:  $0.75 \pm 0.01$ . Parv- vs. Parv+: \*\*\*\* $p < 0.0001$ . Parv- vs. neuropil: \*\*\*\* $p < 0.0001$ . Holm-Šidák multiple comparisons test.

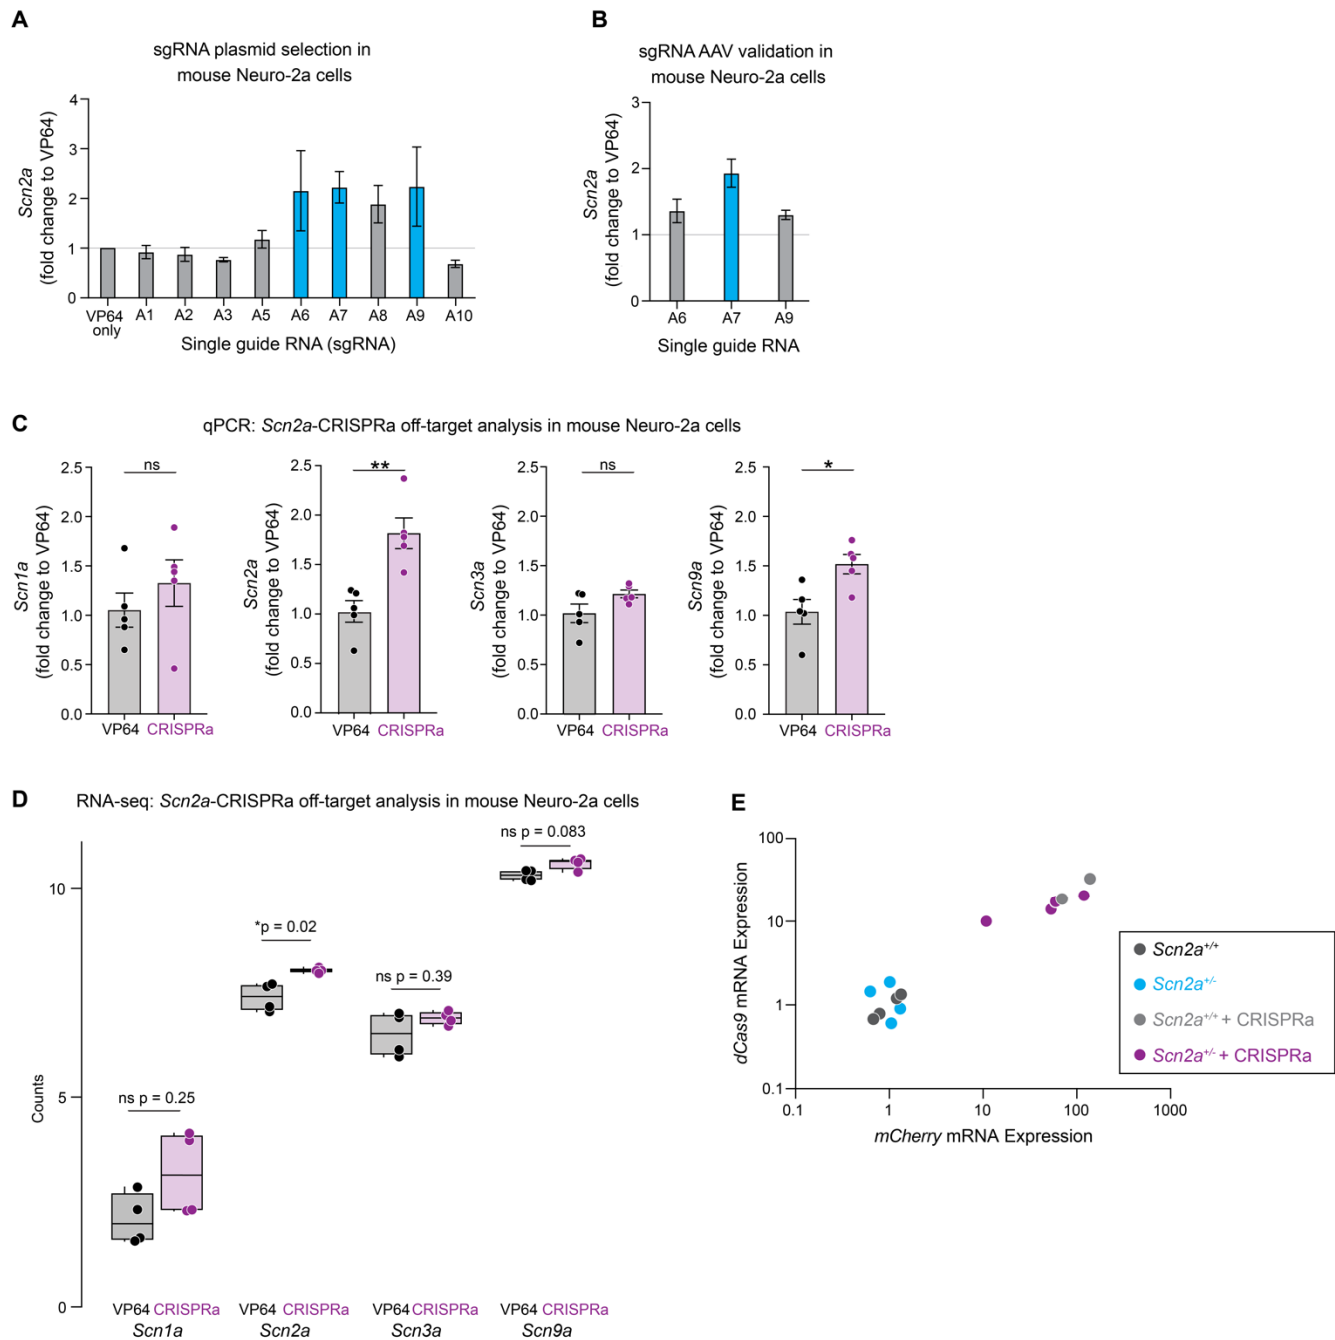

**Figure S2: *In vitro* optimization of CRISPRa constructs in mouse Neuroblastoma-2A (Neuro-2a) cells**

- A:** Fold change of *Scn2a* expression in Neuro-2a cells transfected with plasmids containing sgRNAs targeting the promoter of mouse *Scn2a* compared to a no-sgRNA VP64 control. Blue bars represent plasmids with largest increase in *Scn2a* expression.
- B:** Fold change of *Scn2a* transduced with rAAV-DJ virus in Neuro-2a cells.
- C:** qPCR off-target analysis of transcripts encoding other sodium channels in the topologically associated domain (TAD). Mann-Whitney test.
- D:** RNA-seq of other sodium channel subtypes from *Scn2a*-rAAV-CRISPRa treated Neuro-2a cells compared to VP64-only. Significance noted above data. Wald-log test.
- E:** qPCR analysis of *dCas9* and *mCherry* mRNA within the mPFC of tail vein injected *Scn2a*<sup>+/+</sup> + CRISPRa (light gray) and *Scn2a*<sup>-/-</sup> + CRISPRa (purple) versus uninjected controls *Scn2a*<sup>+/+</sup> (dark gray) or *Scn2a*<sup>-/-</sup> (cyan). Injected animals with at least a 10-fold increase in expression levels of both *dCas9* and *mCherry* to the average *Scn2a*<sup>+/+</sup> uninjected controls were included in EEG datasets in Fig 3.

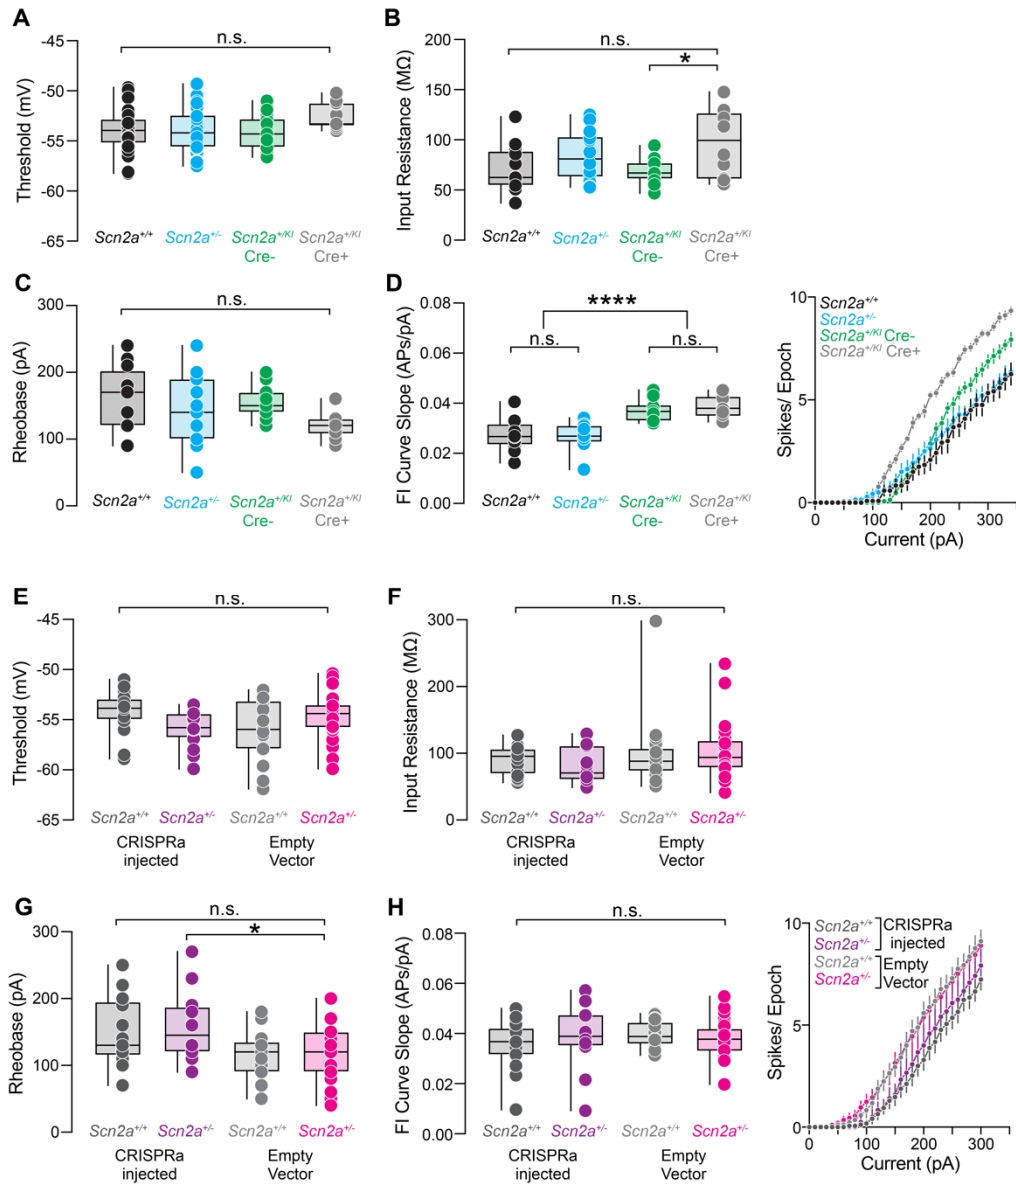

**Figure S3: Additional intrinsic electrophysiological measurements in the *Scn2a*<sup>+KI</sup> conditional mouse model and CRISPRa treated neurons.**

- A:** Summary of AP threshold from P60-70 *Scn2a*<sup>+/+</sup> (black), *Scn2a*<sup>-/-</sup> (cyan), *Scn2a*<sup>+KI</sup> Cre- (green) and *Scn2a*<sup>+KI</sup> Cre+ (gray) neurons. Threshold of the first AP evoked by a near-rheobase current. Box plots are median and quartiles with min. and max. tails. Circles represent single cells. *Scn2a*<sup>+/+</sup>: -54.0 ± 0.3, n = 44 cells; *Scn2a*<sup>-/-</sup>: -54.0 ± 0.4, n = 37 cells, *Scn2a*<sup>+KI</sup> Cre-: -54.1 ± 0.4 n = 18 cells; *Scn2a*<sup>+KI</sup> Cre+: -52.5 ± 0.4, n = 11 cells. No significant differences. Holm-Šidák multiple comparisons test.
- B:** Summary of input resistance (MΩ). *Scn2a*<sup>+/+</sup>: 71.3 ± 6.9, n = 12 cells; *Scn2a*<sup>-/-</sup>: 83.8 ± 6.5, n = 14 cells, *Scn2a*<sup>+KI</sup> Cre-: -69.6 ± 3.1 n = 15 cells; *Scn2a*<sup>+KI</sup> Cre+: 97.7 ± 10.7, n = 10 cells. No significant differences. Holm-Šidák multiple comparisons test.
- C:** Summary of rheobase current (pA) to generate first spike. *Scn2a*<sup>+/+</sup>: 163.3 ± 13.3, n = 12 cells; *Scn2a*<sup>-/-</sup>: 144.3 ± 13.6, n = 14 cells, *Scn2a*<sup>+KI</sup> Cre-: 153.3 ± 5.6 n = 15 cells; *Scn2a*<sup>+KI</sup> Cre+: 119.0 ± 6.1, n = 10 cells. No significant differences. Holm-Šidák multiple comparisons test.
- D:** APs per 300 ms stimulation epoch for each current amplitude. Left: Quantification of firing rate slope of data on Right. *Scn2a*<sup>+/+</sup>: 0.03 ± 0.002, n = 12 cells; *Scn2a*<sup>-/-</sup>: 0.03 ± 0.002, n = 14 cells, *Scn2a*<sup>+KI</sup> Cre-: 0.04 ± 0.001, n = 15 cells; *Scn2a*<sup>+KI</sup> Cre+: 0.04 ± 0.001, n = 10 cells. *Scn2a*<sup>+/+</sup> vs. *Scn2a*<sup>+KI</sup> Cre-: \*\*\*\*p < 0.0001, *Scn2a*<sup>+/+</sup> vs. *Scn2a*<sup>+KI</sup> Cre+: \*\*\*\*p < 0.0001, *Scn2a*<sup>-/-</sup> vs. *Scn2a*<sup>+KI</sup> Cre-: \*\*\*\*p < 0.0001. *Scn2a*<sup>-/-</sup> vs. *Scn2a*<sup>+KI</sup> Cre+: \*\*\*\*p < 0.0001. Holm-Šidák multiple comparisons test. Right: Number of APs versus current amplitude injected.
- E:** Summary of AP threshold from P57-85 *Scn2a*-rAAV-CRISPRa treated *Scn2a*<sup>+/+</sup> (dark gray) and *Scn2a*<sup>-/-</sup> (purple) neurons and *Scn2a*-rAAV-empty transduced *Scn2a*<sup>+/+</sup> (light gray) and *Scn2a*<sup>-/-</sup> (magenta) neurons. Threshold of the first AP evoked by a near-rheobase current. represent single cells. *Scn2a*<sup>+/+</sup> + CRISPRa: -54.2 ± 0.4, n = 24 cells; *Scn2a*<sup>-/-</sup>

- + CRISPRa:  $-55.7 \pm 0.4$ , n = 19 cells, *Scn2a*<sup>+/-</sup> + empty:  $-56 \pm 0.7$  n = 18 cells; *Scn2a*<sup>+/-</sup> + empty:  $-55.6 \pm 0.4$ , n = 29 cells. No significant differences. Holm-Šídák multiple comparisons test.
- F:** Summary of input resistance (M $\Omega$ ) from *Scn2a*-rAAV-CRISPRa or *Scn2a*-rAAV-empty neurons. *Scn2a*<sup>+/+</sup> + CRISPRa:  $89.5 \pm 5.0$ , n = 17 cells; *Scn2a*<sup>+/-</sup> + CRISPRa:  $80.5 \pm 8.0$ , n = 11 cells, *Scn2a*<sup>+/+</sup> + empty:  $99.3 \pm 12.7$ , n = 18 cells; *Scn2a*<sup>+/-</sup> + empty:  $97.7 \pm 10.7$ , n = 29 cells. No significant differences. Holm-Šídák multiple comparisons test.
- G:** Summary of rheobase current (pA) to generate first spike from *Scn2a*-rAAV-CRISPRa or *Scn2a*-rAAV-empty neurons. *Scn2a*<sup>+/+</sup> + CRISPRa:  $148.2 \pm 11.6$ , n = 17 cells; *Scn2a*<sup>+/-</sup> + CRISPRa:  $157.5 \pm 15.2$ , n = 12 cells, *Scn2a*<sup>+/+</sup> + empty:  $116.5 \pm 8.5$ , n = 17 cells; *Scn2a*<sup>+/-</sup> + empty:  $115.9 \pm 7.8$ , n = 29 cells. *Scn2a*<sup>+/-</sup> + CRISPRa vs. *Scn2a*<sup>+/-</sup> + empty: \*p = 0.04. Holm-Šídák multiple comparisons test.
- H:** APs per 300 ms stimulation epoch for each current amplitude. Left: Quantification of firing rate slope of data on Right. *Scn2a*<sup>+/+</sup> + CRISPRa:  $0.04 \pm 0.002$ , n = 17 cells; *Scn2a*<sup>+/-</sup> + CRISPRa:  $0.04 \pm 0.004$ , n = 12 cells, *Scn2a*<sup>+/+</sup> + empty:  $0.04 \pm 0.001$ , n = 17 cells; *Scn2a*<sup>+/-</sup> + empty:  $0.04 \pm 0.001$ , n = 29 cells. No significant differences. Holm-Šídák multiple comparisons test. Right: Number of APs versus current amplitude injected.

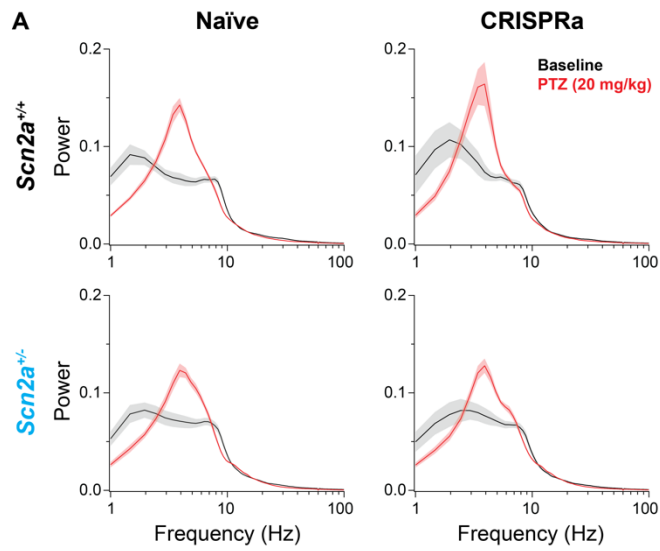

**Figure S4: Power spectral density (PSD) during baseline and 20 mg/kg PTZ administration**

**A:** Average PSD across *Scn2a*<sup>+/+</sup>: n = 24 mice; *Scn2a*<sup>+/-</sup>: n = 16 mice; *Scn2a*<sup>+/+</sup> + CRISPR: n = 7 mice; *Scn2a*<sup>+/-</sup> + CRISPRa: n = 12 mice during baseline (black) and 20 mg/kg PTZ (red). Note marked increase in PSD in 3-5 Hz observed across all conditions.

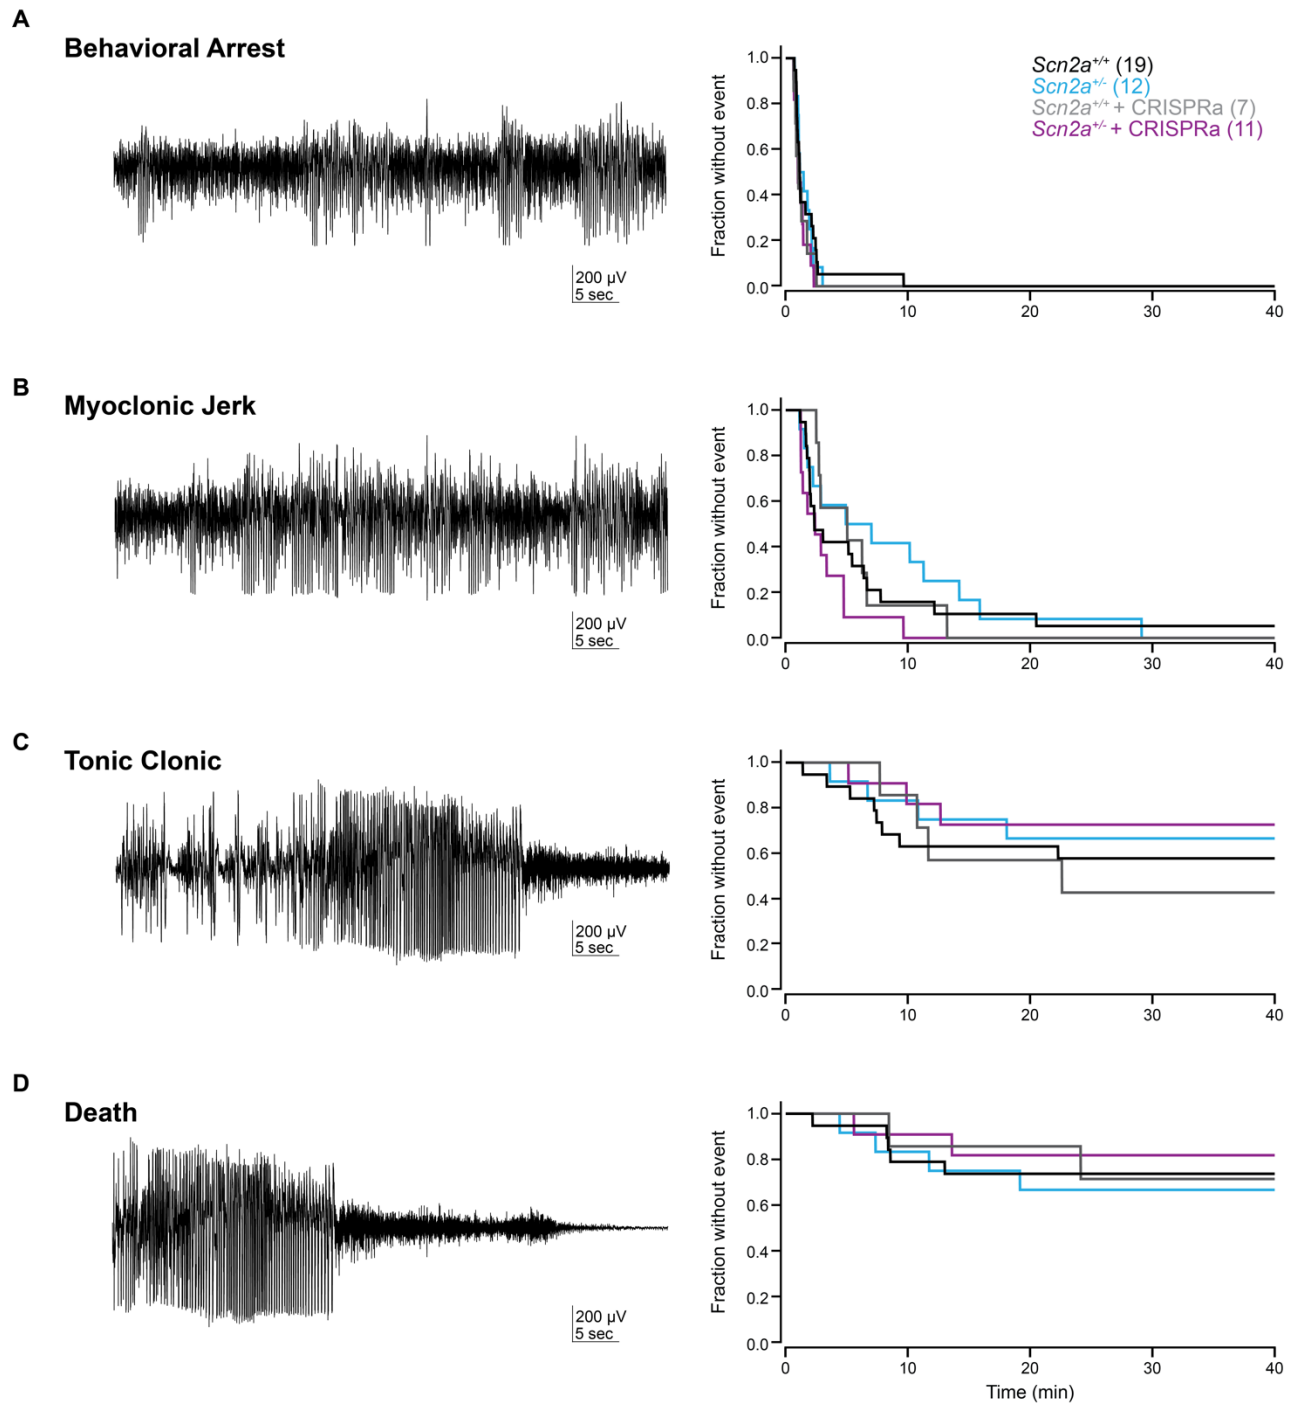

**Figure S5: Detection of 50 mg/kg PTZ-induced seizures**

**A-D:** Left: Example EEG trace of behavioral arrest ( $p = 0.51$ ), myoclonic jerk ( $p = 0.14$ ), tonic clonic seizure ( $p = 0.69$ ; reprinted data from Main Fig. 3), and death ( $p = 0.65$ , Mantel log-rank test). Right: Survival curves over 40 minutes across *Scn2a*<sup>+/+</sup> (black):  $n = 19$  mice; *Scn2a*<sup>+/-</sup> (cyan):  $n = 12$  mice; *Scn2a*<sup>+/+</sup> + CRISPRa (gray):  $n = 7$  mice; *Scn2a*<sup>+/-</sup> + CRISPRa (purple):  $n = 11$ .

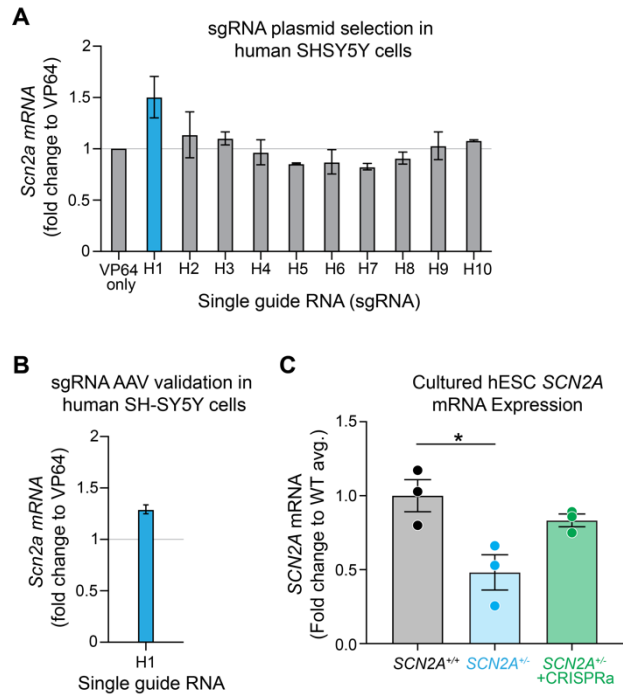

**Figure S6: *In vitro* optimization of CRISPRa constructs in human SH-SY5Y cells**

- A:** Fold change of *Scn2a* expression in SH-SY5Y cells transfected with plasmids containing sgRNAs targeting the promoter of human *Scn2a* compared to a no sgRNA VP64 control.
- B:** Fold change of *Scn2a* transduced with rAAV-DJ virus in human SH-SY5Y cells.
- C:** *SCN2A* mRNA expression from *SCN2A*<sup>+/+</sup> (black), *SCN2A*<sup>+/-</sup> (cyan), and *SCN2A*-rAAV-CRISPRa treated *SCN2A*<sup>+/-</sup> (purple) hESC-derived neurons normalized to wild type average. *SCN2A*<sup>+/+</sup>: 1.0 ± 0.1, n = 3 dishes; *SCN2A*<sup>+/-</sup>: 0.48 ± 0.1, n = 3 dishes; *SCN2A*<sup>+/-</sup> + CRISPRa: 0.8 ± 0.04, n = 3 dishes. *SCN2A*<sup>+/+</sup> vs. *SCN2A*<sup>+/-</sup>: \*p = 0.03. Holm-Šidák multiple comparisons test.

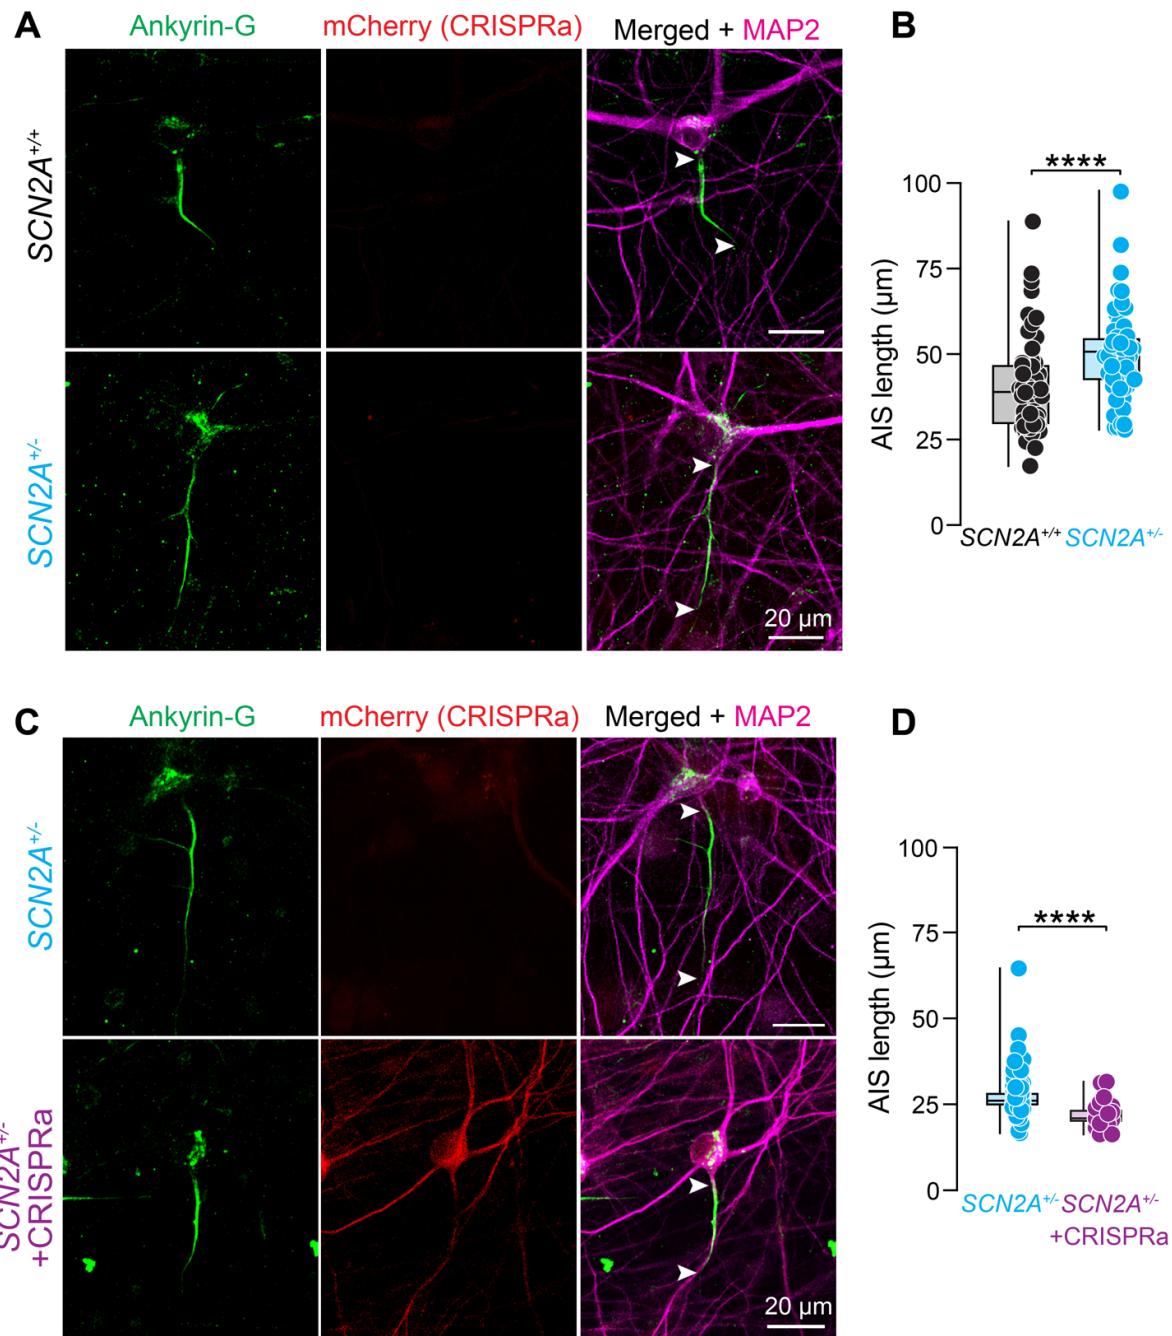

**Figure S7: Axon initial segment structural plasticity in *SCN2A*<sup>+/-</sup> neurons is rescued by CRISPRa.**

**A:** Representative images of *SCN2A*<sup>+/+</sup> (black) and *SCN2A*<sup>+/-</sup> (cyan) human stem-cell-derived neurons immunostained with antibodies against ankyrin-G (green) and MAP2 (magenta). Arrows denote start and end points used to quantify AIS length.

**B:** Quantification of AIS length. *SCN2A*<sup>+/+</sup>:  $40.5 \pm 1.9 \mu\text{m}$ ,  $n = 56$  cells, 3 dishes. *SCN2A*<sup>+/-</sup>:  $50.2 \pm 1.8 \mu\text{m}$ ,  $n = 56$  cells, 3 dishes. \*\*\*\* $p < 0.0001$ . Mann-Whitney test.

**C:** Representative images of *SCN2A*<sup>+/-</sup> neurons expressing *Scn2a*-rAAV-CRISPRa-mCherry (purple) and mCherry-negative internal *SCN2A*<sup>+/-</sup> controls (cyan). Immunostaining against ankyrin-G and MAP2.

**D:** Quantification of AIS length. *SCN2A*<sup>+/-</sup>:  $27.1 \pm 0.5 \mu\text{m}$ ,  $n = 122$  cells, 3 dishes. *SCN2A*<sup>+/-</sup> + CRISPRa:  $22.0 \pm 0.8 \mu\text{m}$ ,  $n = 23$  cells, 3 dishes. \*\*\*\* $p < 0.0001$ . Mann-Whitney test.



**Supplemental Table 1 (Attached): ASD risk genes (Fu et al., 2021) and haploinsufficiency likelihood.**

All genes shown with gene IDs, cDNA length, presence in ASD72 list (genes with genome-wide significance, Fu et al., 2021), and pLI (probability of being loss-of-function intolerance) and LOEUF (loss-of-function observed/expected upper bound fraction) scores. Genes in blue have cDNA > 3000 BPs with a LOEUF score of < 0.273.

**Supplemental Table 2: sgRNA sequences tested per species, and primer sequences used for qPCR.**

| Primers                | Forward                   | Reverse                     |
|------------------------|---------------------------|-----------------------------|
| qPCR-Mouse_Scn2a       | ATTTTCGGCTCATTCTTCACACT   | GGGCGAGGTATCGGTTTTTGT       |
| qPCR-Mouse_Bactin      | GACGATGCTCCCCGGGCTGTATTC  | TCTCTTGCTCTGGGCCTCGTCACC    |
| qPCR-sadCas9-VP64      | ATCACCCCCACCAGATCAAGC     | GTCCTTGCTGTACAGGCCGTTCA     |
| qPCR-Human_SCN2A       | CGTTCCTTTACCAGGGAATCC     | TCCTGTTTGGGTCTCTTAGCTTT     |
| qPCR-Human_Bactin      | CATGTACGTTGCTATCCAGGC     | CTCCTTAATGTCACGCACGAT       |
| genotyping-Mouse_Scn2a | TGCGAGGAGCTAAACAGTGATTAAG | GGCTCCATTCCCTTATCAGACCTACCC |
| <b>tested sgRNA</b>    |                           |                             |
| mouse_Scn2a            | sgRNA sequence            |                             |
| A1                     | ACAGAATCAGTAACGCACTGT     |                             |
| A2                     | CGGGTAAGCCAAGTTTAGTCA     |                             |
| A3                     | AAGCACTTGCCTCACATAAAT     |                             |
| A5                     | CTAGGTCATAGAAAGGAAACC     |                             |
| A6                     | TTTATTGGACCCCAGATATTC     |                             |
| A7                     | AGAAAATTAACCTAGTCATA      |                             |
| A8                     | AAGCCGCCAGGGACCCGAGCA     |                             |
| A9                     | TATAACTGCCACTAGAGGGCT     |                             |
| A10                    | GACCCTCCTCCGGGCTCCACC     |                             |
| human_SCN2A            | sgRNA sequence            |                             |
| H1                     | TGCTGACTGCTACATAGCCAA     |                             |
| H2                     | GTGCTGACTGCTACATAGCCA     |                             |
| H3                     | CTGCTACATAGCCAAAGGAAC     |                             |
| H4                     | GCTCCATCTCCTGGTCAAAG      |                             |
| H5                     | CAGCCATAATTCCACTCTAT      |                             |
| H6                     | AGTAGTTGATTTCAAATAGAG     |                             |
| H7                     | ATTAAAGTAGTTGATTTCAA      |                             |
| H8                     | GATTTCAAATAGAGTGAATT      |                             |
| H9                     | AAGTAGTTGATTTCAAATAGA     |                             |
| H10                    | AGCTCCATCTCCTGGTCAAAA     |                             |

**Supplemental Table 3: AAV titers for all viruses used**

| Sequence    | Serotype | Plasmid                 | Genomic Titer (vg/mL) |
|-------------|----------|-------------------------|-----------------------|
| Mouse sgRNA | DJ       | pU6-sasgRNA-CMV-mCherry | 4.40E+13              |
| Human sgRNA | DJ       | pU6-sasgRNA-CMV-mCherry | 1.33E+14              |
| mCherry     | DJ       | pAAV-CMV-mCherry        | 3.20E+13              |
| sadCas9VP64 | DJ       | pCMV-sadCas9-VP64-pA    | 4.82E+13              |
| Mouse sgRNA | PhP.eb   | pU6-sasgRNA-CMV-mCherry | 5.01E+13              |
| mCherry     | PhP.eb   | pAAV-CMV-mCherry        | 5.00E+13              |
| sadCas9VP64 | PhP.eb   | pCMV-sadCas9-VP64-pA    | 5.02E+13              |
